# Supplementary material for: TRPML2 Mucolipin Channels Drive the Response of Glioma Stem Cells to Temozolomide and Affect the Overall Survival in Glioblastoma Patients
Source: MDPI journal article supplement (doi:10.3390/ijms232315356), 2022-12-05
Supplement: s1 [file s1]

## Supplementary files

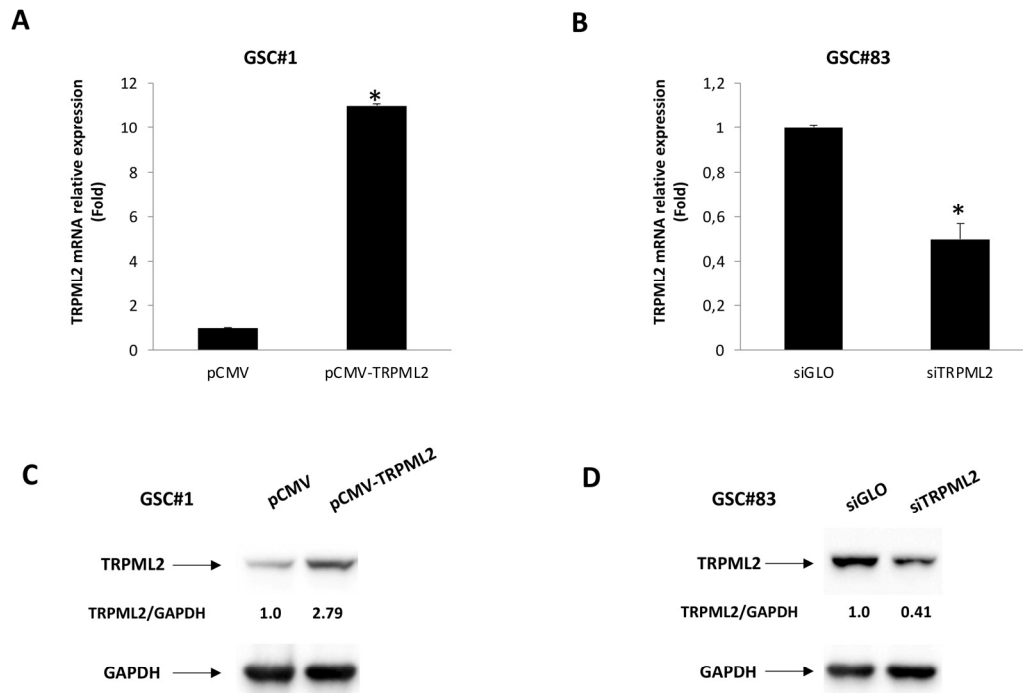

**Figure S1.** TRPML2 transfection models in GSC#1 and GSC#83 lines. (**A,B**) TRPML2 mRNA levels were evaluated by qRT-PCR after 72 h of pCMV-TRPML2 transfection in GSC#1 (**A**) and siTRPML2 transfection in GSC#83 (**B**). Relative TRPML2 expression, normalized to GAPDH mRNA levels, was calculated using siGLO as calibrator. \* $p < 0.05$  vs control cells. (**C,D**) Representative immunoblots reflecting TRPML2 protein levels in pCMV and pCMV-TRPML2 GSC#1 (**C**) and in siGLO and siTRPML2 GSC#83 (**D**) after 72 h of transfection. Densitometry values were normalized to GAPDH, which was used as loading control.

**Table S1.** The clinico-pathologic characteristics of patients with GBM.

| <b>Variables</b>            | <b>Patients (n=16)</b> |
|-----------------------------|------------------------|
| <i>Age, years</i>           |                        |
| range                       | 40-77                  |
| median                      | 57.5                   |
| <i>Sex</i>                  |                        |
| Male                        | 13/16 (81.25%)         |
| Female                      | 3/16 (18.75%)          |
| <i>Tumor localization</i>   |                        |
| Temporal                    | 3/16 (18.75%)          |
| Parietal                    | 6/16 (37.50%)          |
| Frontal                     | 6/16 (37.50%)          |
| Occipital                   | 1/16 (6.25%)           |
| <i>Tumor dimention</i>      |                        |
| ND                          | 4/16 (25.00%)          |
| < 3 cm                      | 3/16 (18.75%)          |
| > 3 cm                      | 9/16 (56.25%)          |
| <i>RxTP preop</i>           |                        |
| No                          | 15/16 (93.75%)         |
| Yes                         | 6.25 (6.25%)           |
| <i>ASP TOT</i>              |                        |
| No                          | 3/16 (18.75%)          |
| Yes                         | 13/16 (82.25%)         |
| <i>5-ALA</i>                |                        |
| No                          | 16/16 (100.00%)        |
| Yes                         | 0/16 (0.00%)           |
| <i>KPSS</i>                 |                        |
| 20                          | 1/16 (6.25%)           |
| 60-70                       | 8/16 (50.00%)          |
| 80-90                       | 7/16 (43.75%)          |
| <i>Recidive</i>             |                        |
| No                          | 15/16 (93.75%)         |
| Yes                         | 1/16 (6.25%)           |
| <i>MGMT promoter status</i> |                        |
| Unmethylated                | 10/16 (62.25%)         |
| Methylated                  | 6/16 (37.75%)          |
| <i>EGFRvIII</i>             |                        |
| Negative                    | 9/16 (56.25%)          |
| Positive                    | 7/16 (43.75%)          |
| <i>PTEN</i>                 |                        |
| ND                          | 1/16 (6.25%)           |
| Normal                      | 11/16 (68.75%)         |
| Hypophosphorilated          | 4/16 (25.00%)          |
| <i>Ki67</i>                 |                        |
| ≤ 20                        | 10/16 (62.25%)         |
| > 20                        | 6/16 (37.50%)          |

**Table S2.** Drug Transporters expression in GSC#1 and GSC#83 lines.

| GSC#1        |                          |                          | GSC#83       |                          |                          |
|--------------|--------------------------|--------------------------|--------------|--------------------------|--------------------------|
| Target genes | mRNA relative expression | mRNA relative expression | Target genes | mRNA relative expression | mRNA relative expression |
| ABCA1        | 0,0000 ± 0,0000          | 0,0226 ± 0,0060          | SLC19A1      | 0,0065 ± 0,0026          | 0,0133 ± 0,0038          |
| ABCA12       | 0,0011 ± 0,0038          | 0,0045 ± 0,0013          | SLC19A2      | 0,0138 ± 0,0075          | 0,0185 ± 0,0053          |
| ABCA13       | 0,0000 ± 0,0000          | 0,0036 ± 0,0010          | SLC19A3      | 0,0040 ± 0,0018          | 0,0037 ± 0,0011          |
| ABCA2        | 0,0184 ± 0,0630          | 0,0402 ± 0,0014          | SLC22A1      | 0,0000 ± 0,0000          | 0,0022 ± 0,0006          |
| ABCA3        | 0,0306 ± 0,1051          | 0,0382 ± 0,0019          | SLC22A2      | 0,0000 ± 0,0000          | 0,0000 ± 0,0000          |
| ABCA4        | 0,0046 ± 0,0159          | 0,0012 ± 0,0003          | SLC22A3      | 0,0000 ± 0,0000          | 0,0064 ± 0,0018          |
| ABCA5        | 0,0122 ± 0,0418          | 0,0168 ± 0,0048          | SLC22A6      | 0,0000 ± 0,0000          | 0,0000 ± 0,0000          |
| ABCA9        | 0,0000 ± 0,0000          | 0,0077 ± 0,0012          | SLC22A7      | 0,0003 ± 0,0001          | 0,0000 ± 0,0000          |
| ABCB1        | 0,0000 ± 0,0000          | 0,0000 ± 0,0000          | SLC22A8      | 0,0003 ± 0,0002          | 0,0024 ± 0,0007          |
| ABCB11       | 0,0000 ± 0,0000          | 0,0000 ± 0,0000          | SLC22A9      | 0,0000 ± 0,0000          | 0,0000 ± 0,0000          |
| ABCB4        | 0,0008 ± 0,0029          | 0,0027 ± 0,0008          | SLC25A13     | 0,0192 ± 0,0058          | 0,0449 ± 0,0028          |
| ABCB5        | 0,0000 ± 0,0000          | 0,0000 ± 0,0000          | SLC28A1      | 0,0006 ± 0,0002          | 0,0013 ± 0,0004          |
| ABCB6        | 0,0320 ± 0,1097          | 0,0505 ± 0,0044          | SLC28A2      | 0,0011 ± 0,0004          | 0,0015 ± 0,0004          |
| ABCC1        | 0,0093 ± 0,0321          | 0,0310 ± 0,0088          | SLC28A3      | 0,0011 ± 0,0003          | 0,0016 ± 0,0004          |
| ABCC10       | 0,0042 ± 0,0146          | 0,0179 ± 0,0051          | SLC29A1      | 0,0220 ± 0,0055          | 0,0399 ± 0,0013          |
| ABCC11       | 0,0010 ± 0,0037          | 0,0016 ± 0,0005          | SLC29A2      | 0,0127 ± 0,0037          | 0,0102 ± 0,0029          |
| ABCC12       | 0,0000 ± 0,0000          | 0,0000 ± 0,0000          | SLC2A1       | 0,3037 ± 0,0147          | 0,1110 ± 0,0015          |
| ABCC2        | 0,0003 ± 0,0002          | 0,0096 ± 0,0007          | SLC2A2       | 0,0000 ± 0,0000          | 0,0000 ± 0,0000          |
| ABCC3        | 0,0077 ± 0,0065          | 0,0360 ± 0,0012          | SLC2A3       | 0,1508 ± 0,0068          | 0,0235 ± 0,0067          |
| ABCC4        | 0,0138 ± 0,0073          | 0,0241 ± 0,0069          | SLC31A1      | 0,0164 ± 0,0064          | 0,0714 ± 0,0003          |
| ABCC5        | 0,0100 ± 0,0045          | 0,0297 ± 0,0085          | SLC38A2      | 0,0782 ± 0,0080          | 0,2731 ± 0,0377          |
| ABCD1        | 0,0096 ± 0,0032          | 0,0333 ± 0,0095          | SLC38A5      | 0,0019 ± 0,0008          | 0,0026 ± 0,0007          |
| ABCD3        | 0,0474 ± 0,0026          | 0,0679 ± 0,0193          | SLC3A1       | 0,0027 ± 0,0002          | 0,0031 ± 0,0008          |
| ABCD4        | 0,0191 ± 0,0055          | 0,0363 ± 0,0003          | SLC3A2       | 0,1294 ± 0,0133          | 0,2270 ± 0,0446          |
| ABCF1        | 0,0224 ± 0,0067          | 0,0681 ± 0,0194          | SLC5A1       | 0,0010 ± 0,0005          | 0,0000 ± 0,0000          |
| ABCG2        | 0,0037 ± 0,0019          | 0,0059 ± 0,0017          | SLC5A4       | 0,0000 ± 0,0000          | 0,0018 ± 0,0005          |
| ABCG8        | 0,0000 ± 0,0000          | 0,0000 ± 0,0000          | SLC7A11      | 0,0039 ± 0,0005          | 0,0329 ± 0,0093          |
| AQP1         | 0,0346 ± 0,0087          | 0,1644 ± 0,0468          | SLC7A5       | 0,1054 ± 0,0113          | 0,2235 ± 0,0136          |
| AQP7         | 0,0000 ± 0,0000          | 0,0014 ± 0,0004          | SLC7A6       | 0,0080 ± 0,0007          | 0,0324 ± 0,0092          |
| AQP9         | 0,0000 ± 0,0000          | 0,0014 ± 0,0004          | SLC7A7       | 0,0027 ± 0,0003          | 0,0052 ± 0,0005          |
| ATP6VOC      | 0,0645 ± 0,0010          | 0,1268 ± 0,0361          | SLC7A8       | 0,0104 ± 0,0009          | 0,0066 ± 0,0019          |
| ATP7A        | 0,0067 ± 0,0031          | 0,021 ± 0,0060           | SLC7A9       | 0,0000 ± 0,0000          | 0,0008 ± 0,0002          |
| ATP7B        | 0,0037 ± 0,0018          | 0,002 ± 0,0006           | SLC01A2      | 0,0000 ± 0,0000          | 0,0000 ± 0,0000          |
| MVP          | 0,0157 ± 0,0038          | 0,1101 ± 0,0313          | SLC01B1      | 0,0005 ± 0,0002          | 0,0008 ± 0,0002          |
| SLC10A1      | 0,0005 ± 0,0018          | 0,0009 ± 0,0003          | SLC01B3      | 0,0000 ± 0,0000          | 0,0000 ± 0,0000          |
| SLC10A2      | 0,0000 ± 0,0000          | 0,0000 ± 0,0000          | SLC02A1      | 0,0009 ± 0,0001          | 0,0174 ± 0,0049          |
| SLC15A1      | 0,0000 ± 0,0000          | 0,0007 ± 0,0002          | SLC02B1      | 0,0000 ± 0,0000          | 0,0005 ± 0,0001          |
| SLC15A2      | 0,0061 ± 0,0009          | 0,0017 ± 0,0005          | SLC03A1      | 0,0004 ± 0,0001          | 0,0671 ± 0,0090          |
| SLC16A1      | 0,0791 ± 0,0010          | 0,1034 ± 0,0294          | SLC04A1      | 0,0449 ± 0,0039          | 0,0904 ± 0,0257          |
| SLC16A2      | 0,0059 ± 0,0003          | 0,0265 ± 0,0075          | VDAC1        | 0,0445 ± 0,0027          | 0,1383 ± 0,0393          |
| SLC16A3      | 0,0124 ± 0,0025          | 0,0405 ± 0,0015          | VDAC2        | 0,0911 ± 0,0024          | 0,1433 ± 0,0408          |

Human Drug Transporters RT profiler PCR array in mRNA samples extracted from GSC#1 and GSC#83. The expression levels were normalized to the average Ct value of ACTB and calculated by the  $\Delta\Delta Ct$  method. ABCA1, ATP-binding cassette, sub-family A (ABC1), member 1 (ABCA1); ABC1 member 12 (ABCA12); ABC1 member 13 (ABCA13); ABC1 member 2 (ABCA2); ABC1, member 3 (ABCA3); ABC1 member 4 (ABCA4); ABC1 member 5 (ABCA5); ABC1 member 9 (ABCA9); ATP-binding cassette, sub-family B (MDR/TAP), member 1 (ABCB1); MDR/TAP member 11 (ABCB11); MDR/TAP member 4 (ABCB4); MDR/TAP member 5 (ABCB5); MDR/TAP, member 6 (ABCB6); (CFTR/MRP), member 1 (ABCC1); CFTR/MRP member 10 (ABCC10); CFTR/MRP member 11 (ABCC11); CFTR/MRP member 12 (ABCC12); CFTR/MRP member 2

(ABCC2); CFTR/MRP member 3 (ABCC3); CFTR/MRP member 4 (ABCC4); CFTR/MRP member 5 (ABCC5); ATP-binding cassette, sub-family D (ALD), member 1 (ABCD1); ALD member 3 (ABCD3); ALD member 4 (ABCD4); ATP-binding cassette, sub-family F (GCN20), member 1 (ABCF1); ATP-binding cassette, sub-family G (WHITE), member 2 (ABCG2); WHITE member 8 (ABCG8); Aquaporin 1 (AQP1); Aquaporin 7 (AQP7); Aquaporin 9 (AQP9); ATPase, H<sup>+</sup> transporting, lysosomal 16kDa, V0 subunit c (ATP6V0C); ATPase, Cu<sup>++</sup> transporting, alpha polypeptide (ATP7A); ATPase, Cu<sup>++</sup> transporting, beta polypeptide (ATP7B); Major vault protein (MVP); Solute carrier family 10 (sodium/bile acid cotransporter family), member 1 (SLC10A1); Solute carrier family 10 (sodium/bile acid cotransporter family), member 2 (SLC10A2); Solute carrier family 15 (oligopeptide transporter), member 1 (SLC15A1); Solute carrier family 15 (H<sup>+</sup>/peptide transporter), member 2 (SLC15A2); Solute carrier family 16, member 1 (monocarboxylic acid transporter 1) (SLC16A1); Solute carrier family 16, member 2 (monocarboxylic acid transporter 8) (SLC16A2); Solute carrier family 16, member 3 (monocarboxylic acid transporter 4) (SLC16A3); Solute carrier family 19 (folate transporter), member 1 (SLC19A1); Solute carrier family 19 (thiamine transporter), member 2 (SLC19A2); Solute carrier family 19, member 3 (SLC19A3); Solute carrier family 22 (organic cation transporter), member 1 (SLC22A1); Solute carrier family 22 (organic cation transporter), member 2 (SLC22A2); Solute carrier family 22 (extraneuronal monoamine transporter), member 3 (SLC22A3); Solute carrier family 22 (organic anion transporter), member 6 (SLC22A6); Solute carrier family 22 (organic anion transporter), member 7 (SLC22A7); Solute carrier family 22 (organic anion transporter), member 8 (SLC22A8); Solute carrier family 22 (organic anion transporter), member 9 (SLC22A9); Solute carrier family 25, member 13 (citrin) (SLC25A13); Solute carrier family 28 (sodium-coupled nucleoside transporter), member 1 (SLC28A1); Solute carrier family 28 (sodium-coupled nucleoside transporter), member 2 (SLC28A2); Solute carrier family 28 (sodium-coupled nucleoside transporter), member 3 (SLC28A3); Solute carrier family 29 (nucleoside transporters), member 1 (SLC29A1); Solute carrier family 29 (nucleoside transporters), member 2 (SLC29A2); Solute carrier family 2 (facilitated glucose transporter), member 1 (SLC2A1); Solute carrier family 2 (facilitated glucose transporter), member 2 (SLC2A2); Solute carrier family 2 (facilitated glucose transporter), member 3 (SLC2A3); Solute carrier family 31 (copper transporters), member 1 (SLC31A1); Solute carrier family 38, member 2 (SLC38A2); Solute carrier family 38, member 5 (SLC38A5); Solute carrier family 3 (cystine, dibasic and neutral amino acid transporters, activator of cystine, dibasic and neutral amino acid transport), member 1 (SLC3A1); Solute carrier family 3 (activators of dibasic and neutral amino acid transport), member 2 (SLC3A2); Solute carrier family 5 (sodium/glucose cotransporter), member 1 (SLC5A1); Solute carrier family 5 (low affinity glucose cotransporter), member 4 (SLC5A4); Solute carrier family 7 (anionic amino acid transporter light chain, xc<sup>-</sup> system), member 11 (SLC7A11); Solute carrier family 7 (amino acid transporter light chain, L system), member 5 (SLC7A5); Solute carrier family 7 (amino acid transporter light chain, y<sup>+</sup>L system), member 6 (SLC7A6); Solute carrier family 7 (amino acid transporter light chain, y<sup>+</sup>L system), member 7 (SLC7A7); Solute carrier family 7 (amino acid transporter light chain, L system), member 8 (SLC7A8); Solute carrier family 7 (glycoprotein-associated amino acid transporter light chain, bo<sup>+</sup> system), member 9 (SLC7A9); Solute carrier organic anion transporter family, member 1A2 (SLCO1A2); Solute carrier organic anion transporter family, member 1B1 (SLCO1B1); Solute carrier organic anion transporter family, member 1B3 (SLCO1B3); Solute carrier organic anion transporter family, member 2A1 (SLCO2A1); Solute carrier organic anion transporter family, member 2B1 (SLCO2B1); Solute carrier organic anion transporter family, member 3A1 (SLCO3A1); Solute carrier organic anion transporter family, member 4A1 (SLCO4A1); Voltage-dependent anion channel 1 (VDAC1); Voltage-dependent anion channel 2 (VDAC2).

**Table S3.** Drug Transporters expression in pCMV-TRPML2 GSC#1 and siTRPML2 GSC#83 lines.

| Target genes | pCMV-TRPML2 GSC#1 | siTRPML2 GSC#83 |
|--------------|-------------------|-----------------|
|              | Fold expression   | Fold expression |
| ABCA1        | Induced           | 2.16 ± 0.41     |
| ABCA12       | 3.72 ± 0.70       |                 |
| ABCB1        |                   | Induced         |
| ABCB4        | Silenced          | 0.27 ± 0.05     |
| ABCB5        |                   | Induced         |
| ABCB11       | Silenced          | Induced         |
| ABCC2        | 8.10 ± 1.51       |                 |
| ABCC3        | 0.64 ± 0.03       | 1.61 ± 0.23     |
| ABCC11       | Silenced          |                 |
| ABCD1        | 0.96 ± 0.17       | 2.10 ± 0.39     |
| ABCD4        | 2.20 ± 0.41       |                 |
| ABCG2        | 0.95 ± 0.13       | 1.34 ± 0.12     |
| AQP1         | 0.85 ± 0.19       | 1.15 ± 0.12     |
| AQP7         |                   | 2.16 ± 0.40     |
| AQP9         | Induced           |                 |
| ATP6VOC      | 0.85 ± 0.21       | 1.08 ± 0.31     |
| ATP7B        | 0.91 ± 0.07       | 3.03 ± 0.56     |
| SLC10A1      | 2.89 ± 0.53       | 1.3 ± 0.41      |
| SLC15A1      |                   | Silenced        |
| SLC15A2      |                   | Silenced        |
| SLC16A1      | 0.87 ± 0.09       | 1.59 ± 0.21     |
| SLC16A2      | 0.55 ± 0.10       |                 |
| SLC22A1      |                   | 2.20 ± 0.41     |
| SLC22A2      | Induced           |                 |
| SLC22A7      | 5.78 ± 1.08       |                 |
| SLC22A8      | Silenced          | Silenced        |
| SLC25A13     | 0.85 ± 0.11       |                 |
| SLC28A1      | 2.42 ± 0.45       | 0.91 ± 0.09     |
| SLC28A2      | 4.02 ± 0.75       | 0.79 ± 0.12     |
| SLC29A1      | 0.89 ± 0.05       | 1.64 ± 0.25     |
| SLC29A2      | 0.91 ± 0.07       | 1.43 ± 0.17     |
| SLC28A3      | 2.05 ± 0.38       |                 |
| SLC38A5      | 2.55 ± 0.48       |                 |
| SLC2A1       | 0.65 ± 0.12       | 1.47 ± 0.12     |
| SLC2A2       |                   | Induced         |
| SLC3A1       | 0.84 ± 0.08       | 1.71 ± 0.33     |
| SLC5A1       | Silenced          |                 |
| SLC5A4       | Induced           | 2.60 ± 0.49     |
| SLC7A7       | 2.40 ± 0.36       |                 |
| SLC7A8       | 0.87 ± 0.07       | 1.54 ± 0.23     |
| SLC7A9       | Induced           |                 |
| SLC01B1      | 2.42 ± 0.36       | 2.81 ± 0.52     |
| SLC02A1      | 0.85 ± 0.08       | 1.68 ± 0.26     |
| SLC02B1      | 2.10 ± 0.39       |                 |
| SLC03A1      | Silenced          | 1.34 ± 0.11     |

Human Drug Transporters RT profiler PCR array in mRNA samples extracted from GSC#1. The expression levels were normalized to the average Ct value of two housekeeping genes (ACTB and RPLP0) and calculated by the  $\Delta\Delta C_t$  method. Values represent fold differences of individual gene expression in pCMV-TRPML2 compared to pCMV GSC#1 and siTRPML2 compared to siGLO GSC#83 cells.

ABCA1, ATP-binding cassette, sub-family A (ABC1), member 1 (ABCA1); ABC1 member 12 (ABCA12); ATP-binding cassette, sub-family B (MDR/TAP), member 1 (ABCB1); ATP-binding cassette, sub-family B (MDR/TAP), member 11 (ABCB11); MDR/TAP member 4 (ABCB4); MDR/TAP member 5 (ABCB5); CFTR/MRP member 2

(ABCC2); CFTR/MRP member 3 (ABCC3); CFTR/MRP member 11 (ABCC11); ALD member 4 (ABCD4); ATP-binding cassette, sub-family G (WHITE), member 2 (ABCG2); Aquaporin 1 (AQP1); Aquaporin 7 (AQP7); Aquaporin 9 (AQP9); ATPase, H<sup>+</sup> transporting, lysosomal 16kDa, V0 subunit c (ATP6V0C); ATPase, Cu<sup>++</sup> transporting, beta polypeptide (ATP7B); Solute carrier family 10 (sodium/bile acid cotransporter family), member 1 (SLC10A1); Solute carrier family 15 (oligopeptide transporter), member 1 (SLC15A1); Solute carrier family 15 (H<sup>+</sup>/peptide transporter), member 2 (SLC15A2); Solute carrier family 16, member 1 (monocarboxylic acid transporter 1) (SLC16A1); Solute carrier family 16, member 2 (monocarboxylic acid transporter 8)(SLC16A2); Solute carrier family 22 (organic cation transporter), member 1 (SLC22A1); Solute carrier family 22 (organic cation transporter), member 2 (SLC22A2); Solute carrier family 22 (organic anion transporter), member 7 (SLC22A7); Solute carrier family 22 (organic anion transporter), member 8 (SLC22A8); Solute carrier family 28 (sodium-coupled nucleoside transporter), member 1 (SLC28A1); Solute carrier family 28 (sodium-coupled nucleoside transporter), member 2 (SLC28A2); Solute carrier family 28 (sodium-coupled nucleoside transporter), member 3 (SLC28A3); Solute carrier family 29 (nucleoside transporters), member 1 (SLC29A1); Solute carrier family 29 (nucleoside transporters), member 2 (SLC29A2); Solute carrier family 2 (facilitated glucose transporter), member 1 (SLC2A1); Solute carrier family 2 (facilitated glucose transporter), member 2 (SLC2A2); Solute carrier family 31 (copper transporters), member 1 (SLC31A1); Solute carrier family 5 (sodium/glucose cotransporter), member 1 (SLC5A1); Solute carrier family 5 (low affinity glucose cotransporter), member 4 (SLC5A4); Solute carrier family 7 (amino acid transporter light chain,  $\gamma$ +L system), member 7 (SLC7A7); Solute carrier family 7 (amino acid transporter light chain, L system), member 8 (SLC7A8); Solute carrier family 7 (glycoprotein-associated amino acid transporter light chain, bo,+ system), member 9 (SLC7A9); Solute carrier organic anion transporter family, member 1B1 (SLCO1B1); Solute carrier organic anion transporter family, member 2A1 (SLCO2A1); Solute carrier organic anion transporter family, member 2B1 (SLCO2B1); Solute carrier organic anion transporter family, member 3A1 (SLCO3A1).

**Table S4.** Kaplan-Meier p-values.

| OS, p value                             | Methylated<br>MGMT<br>TRPML2<br>negative | Methylated<br>MGMT<br>TRPML2 positive | Unmethylated<br>MGMT<br>TRPML2 negative | Unmethylated<br>MGMT<br>TRPML2 positive |
|-----------------------------------------|------------------------------------------|---------------------------------------|-----------------------------------------|-----------------------------------------|
| Methylated MGMT<br>TRPML2 negative      |                                          | 0.0295 *                              | 0.9876                                  | 0.0094 *                                |
| Methylated MGMT<br>TRPML2 positive      | 0.0295 *                                 |                                       | 0.0295 *                                | 0.6392                                  |
| Unmethylated<br>MGMT<br>TRPML2 negative | 0.9876                                   | 0.0295 *                              |                                         | 0.0094 *                                |
| Unmethylated<br>MGMT<br>TRPML2 positive | 0.0094 *                                 | 0.6392                                | 0.0094 *                                |                                         |

  

| PFS, p value                            | Methylated<br>MGMT<br>TRPML2<br>negative | Methylated<br>MGMT<br>TRPML2 positive | Unmethylated<br>MGMT<br>TRPML2 negative | Unmethylated<br>MGMT<br>TRPML2 positive |
|-----------------------------------------|------------------------------------------|---------------------------------------|-----------------------------------------|-----------------------------------------|
| Methylated MGMT<br>TRPML2 negative      |                                          | 0.0295 *                              | 0.8292                                  | 0.0168 *                                |
| Methylated MGMT<br>TRPML2 positive      | 0.0295 *                                 |                                       | 0.2254                                  | 0.1048                                  |
| Unmethylated<br>MGMT<br>TRPML2 negative | 0.8292                                   | 0.2254                                |                                         | 0.0094 *                                |
| Unmethylated<br>MGMT<br>TRPML2 positive | 0.0168 *                                 | 0.1048                                | 0.0094 *                                |                                         |

| OS, p value                          | EGFRvIII negative<br>TRPML2 negative | EGFRvIII negative<br>TRPML2 positive | EGFRvIII positive<br>TRPML2 negative | EGFRvIII positive<br>TRPML2 positive |
|--------------------------------------|--------------------------------------|--------------------------------------|--------------------------------------|--------------------------------------|
| EGFRvIII negative<br>TRPML2 negative |                                      | 0.0027 *                             | 0.0253 *                             | 0.0023 *                             |
| EGFRvIII negative<br>TRPML2 positive | 0.0027 *                             |                                      | 0.1161                               | 0.0013 *                             |
| EGFRvIII positive<br>TRPML2 negative | 0.0253 *                             | 0.1161                               |                                      | 0.0928                               |
| EGFRvIII positive<br>TRPML2 positive | 0.0023 *                             | 0.0013 *                             | 0.0928                               |                                      |

| PFS, p value                         | EGFRvIII negative<br>TRPML2 negative | EGFRvIII negative<br>TRPML2 positive | EGFRvIII positive<br>TRPML2 negative | EGFRvIII positive<br>TRPML2 positive |
|--------------------------------------|--------------------------------------|--------------------------------------|--------------------------------------|--------------------------------------|
| EGFRvIII negative<br>TRPML2 negative |                                      | 0.0047 *                             | 0.7046                               | 0.0109 *                             |
| EGFRvIII negative<br>TRPML2 positive | 0.0047 *                             |                                      | 0.0455 *                             | 0.0027 *                             |
| EGFRvIII positive<br>TRPML2 negative | 0.7046                               | 0.0455 *                             |                                      | 0.0895                               |
| EGFRvIII positive<br>TRPML2 positive | 0.0109 *                             | 0.0027 *                             | 0.0895                               |                                      |

| OS, p value                  | Ki67 ≤ 20<br>TRPML2 negative | Ki67 ≤ 20<br>TRPML2 positive | Ki67 > 20<br>TRPML2 positive |
|------------------------------|------------------------------|------------------------------|------------------------------|
| Ki67 ≤ 20<br>TRPML2 negative |                              | 0.0013 *                     | 0.0007 *                     |
| Ki67 ≤ 20<br>TRPML2 positive | 0.0013 *                     |                              | 0.7824                       |
| Ki67 > 20<br>TRPML2 positive | 0.0007 *                     | 0.7824                       |                              |

  

| PFS, p value                 | Ki67 ≤ 20<br>TRPML2 negative | Ki67 ≤ 20<br>TRPML2 positive | Ki67 > 20<br>TRPML2 positive |
|------------------------------|------------------------------|------------------------------|------------------------------|
| Ki67 ≤ 20<br>TRPML2 negative |                              | 0.0140 *                     | 0.0009 *                     |
| Ki67 ≤ 20<br>TRPML2 positive | 0.0140 *                     |                              | 0.2449                       |
| Ki67 > 20<br>TRPML2 positive | 0.0009 *                     | 0.2449                       |                              |



| OS, p value                    | Normal PTEN<br>TRPML2 negative | Normal PTEN<br>TRPML2 positive | Hypo PTEN<br>TRPML2 negative | Hypo PTEN<br>TRPML2 positive |
|--------------------------------|--------------------------------|--------------------------------|------------------------------|------------------------------|
| Normal PTEN<br>TRPML2 negative |                                | 0.0089 *                       | 0.2072                       | 0.0389 *                     |
| Normal PTEN<br>TRPML2 positive | 0.0089 *                       |                                | 0.0253 *                     | 0.0742                       |
| Hypo PTEN<br>TRPML2 negative   | 0.2072                         | 0.0253 *                       |                              | 0.0896                       |
| Hypo PTEN<br>TRPML2 positive   | 0.0389 *                       | 0.0742                         | 0.0896                       |                              |

  

| PFS, p value                   | Normal PTEN<br>TRPML2 negative | Normal PTEN<br>TRPML2 positive | Hypo PTEN<br>TRPML2 negative | Hypo PTEN<br>TRPML2 positive |
|--------------------------------|--------------------------------|--------------------------------|------------------------------|------------------------------|
| Normal PTEN<br>TRPML2 negative |                                | 0.043 *                        | 0.8864                       | 0.0455 *                     |
| Normal PTEN<br>TRPML2 positive | 0.043 *                        |                                | 0.0228 *                     | 0.0662                       |
| Hypo PTEN<br>TRPML2 negative   | 0.8864                         | 0.0228 *                       |                              | 0.0833                       |
| Hypo PTEN<br>TRPML2 positive   | 0.0455 *                       | 0.0662                         | 0.0833                       |                              |
